# Supplementary material for: Cross‐Sectional Relationships of Proximal Aortic Stiffness and Left Ventricular Diastolic Function in Adults in the Community
Source: PubMed Central journal article supplement — J Am Heart Assoc. 2022 Dec 19;11(24):e027230. doi: 10.1161/JAHA.122.027230 (PMC9798804; doi:10.1161/jaha.122.027230), 2022-12-19
Supplement: JAH3-11-e027230-s001.pdf [file JAH3-11-e027230-s001.pdf]

## **SUPPLEMENTAL MATERIAL**

**Table S1. Associations of continuous LV diastolic dysfunction with aortic stiffness, additionally adjusted for time difference between CMR and echo.**

|                                                                                                                                                                                                                                                                                                                                                                                                                                                                                                                                                                                                                                                                                                                                                                                                                                                                           | <b>E/A</b><br>Est. $\beta \pm$ SE | <b>E wave area</b><br>Est. $\beta \pm$ SE | <b>e'</b><br>Est. $\beta \pm$ SE | <b>E/e'</b><br>Est. $\beta \pm$ SE | <b>E wave deceleration time</b><br>Est. $\beta \pm$ SE |
|---------------------------------------------------------------------------------------------------------------------------------------------------------------------------------------------------------------------------------------------------------------------------------------------------------------------------------------------------------------------------------------------------------------------------------------------------------------------------------------------------------------------------------------------------------------------------------------------------------------------------------------------------------------------------------------------------------------------------------------------------------------------------------------------------------------------------------------------------------------------------|-----------------------------------|-------------------------------------------|----------------------------------|------------------------------------|--------------------------------------------------------|
| <b>Age-, Sex- and Time-Difference-Adjusted</b>                                                                                                                                                                                                                                                                                                                                                                                                                                                                                                                                                                                                                                                                                                                                                                                                                            |                                   |                                           |                                  |                                    |                                                        |
| Pulse wave velocity                                                                                                                                                                                                                                                                                                                                                                                                                                                                                                                                                                                                                                                                                                                                                                                                                                                       | -0.11<br>(0.029)<br>$p=0.0002$    | -0.023<br>(0.007)<br>$p=0.0004$           | -0.07<br>(0.027)<br>$p=0.011$    | -0.039<br>(0.029)<br>$p=0.174$     | 0.030<br>(0.03)<br>$p=0.314$                           |
| Aortic strain                                                                                                                                                                                                                                                                                                                                                                                                                                                                                                                                                                                                                                                                                                                                                                                                                                                             | 0.02<br>(0.03)<br>$p=0.426$       | -0.001<br>(0.007)<br>$p=0.894$            | 0.009<br>(0.03)<br>$p=0.756$     | -0.03<br>(0.03)<br>$p=0.328$       | -0.085<br>(0.03)<br>$p=0.007$                          |
| <b>Multivariable and Time-Difference-Adjusted</b>                                                                                                                                                                                                                                                                                                                                                                                                                                                                                                                                                                                                                                                                                                                                                                                                                         |                                   |                                           |                                  |                                    |                                                        |
| Pulse wave velocity                                                                                                                                                                                                                                                                                                                                                                                                                                                                                                                                                                                                                                                                                                                                                                                                                                                       | -0.1<br>(0.028)<br>$p=0.0002$     | -0.017<br>(0.007)<br>$p=0.013$            | -0.062<br>(0.027)<br>$p=0.023$   | -0.02<br>(0.028)<br>$p=0.466$      | 0.049<br>(0.03)<br>$p=0.110$                           |
| Aortic strain                                                                                                                                                                                                                                                                                                                                                                                                                                                                                                                                                                                                                                                                                                                                                                                                                                                             | -0.02<br>(0.028)<br>$p=0.406$     | -0.007<br>(0.007)<br>$p=0.325$            | -0.005<br>(0.029)<br>$p=0.858$   | -0.037<br>(0.029)<br>$p=0.205$     | -0.098<br>(0.03)<br>$p=0.002$                          |
| <p>Data presented as beta (standard error) per standard deviation unit increment in predictor variable.</p> <p>Mean time between CMR and echocardiogram 26±13 months. Adjusted for time difference in this supplemental analysis.</p> <p>Aortic stiffness variables (proximal descending aortic strain, aortic arch PWV) were log<sub>e</sub> transformed to achieve normal distribution.</p> <p>Multivariable-adjusted model included age, sex, height, weight, systolic blood pressure, diastolic blood pressure, heart rate, total/HDL cholesterol, usage of antihypertensive medication, usage of lipid lowering medication, diabetes mellitus status, smoking status. All continuous variables were standardized.</p> <p>Abbreviations: LV = left ventricle, CMR = Cardiac Magnetic Resonance Imaging, PWV = pulse wave velocity, HDL = high-density lipoprotein</p> |                                   |                                           |                                  |                                    |                                                        |

**Figure S1. Bland-Altman plots demonstrating inter-reader agreement for (A) pulse wave velocity and (B) aortic strain.**

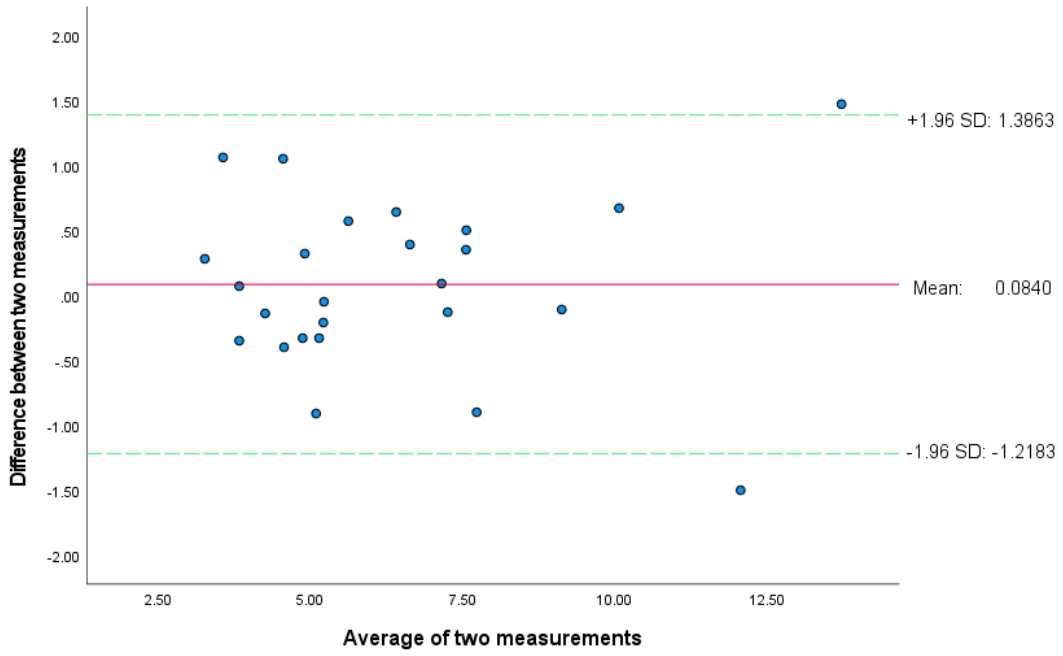

**A.**

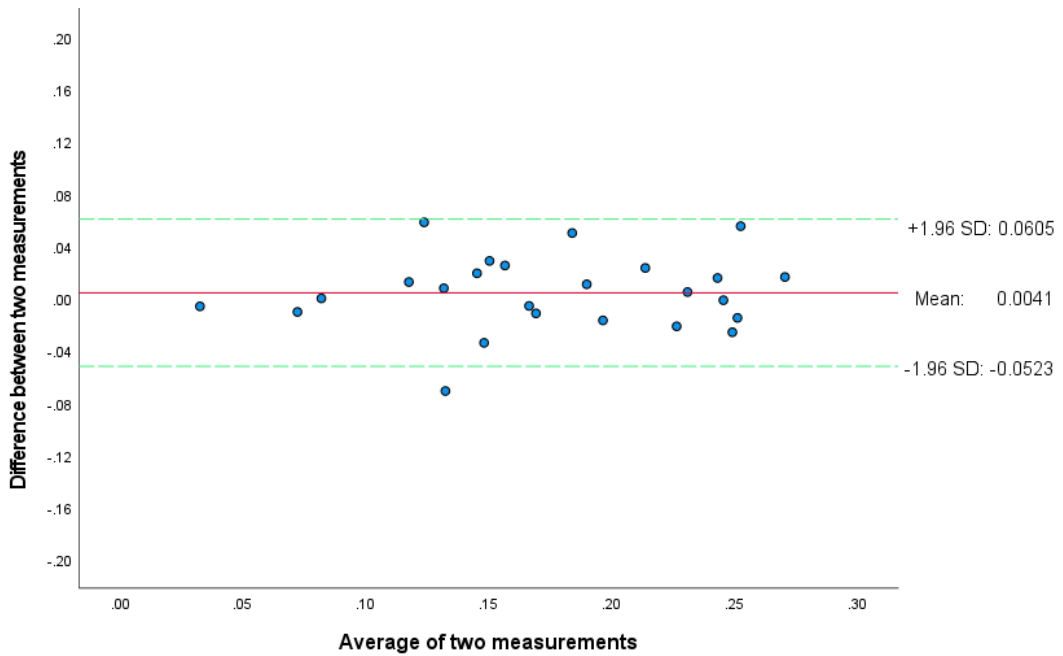

**B.**
